# Supplementary material for: Effectiveness and Safety Profiles of Biological Therapies in Inflammatory Bowel Disease: Real Life Data from an Active Pharmacovigilance Project
Source: MDPI journal article supplement (doi:10.3390/biomedicines10123280), 2022-12-18
Supplement: s1 [file s1]

**Table S1.** Total years of treatment and number of failures and adverse drug reactions divided by therapy-lines.

|     | 1°<br>line | Total years<br>of<br>treatment | Failure<br>(Failure/10<br>yrs) | ADR<br>(ADRs/10<br>yrs) | 2°<br>line | Total years<br>of<br>treatment | Failure<br>(Failure/10<br>yrs) | ADR<br>(ADRs/10<br>yrs) | 3°<br>line | Total years<br>of<br>treatment | Failure<br>(Failure/10<br>yrs) | ADR (ADRs/10<br>yrs) |
|-----|------------|--------------------------------|--------------------------------|-------------------------|------------|--------------------------------|--------------------------------|-------------------------|------------|--------------------------------|--------------------------------|----------------------|
| IFX | 209        | 590.5                          | 40 (0.7)                       | 73 (1.2)                | 62         | 110.1                          | 13 (1.2)                       | 19 (1.7)                | 6          | 10.2                           | 1 (1.0)                        | 3 (2.9)              |
| ADA | 210        | 616.2                          | 52 (0.8)                       | 64 (1.0)                | 72         | 263.8                          | 26 (1.0)                       | 19 (0.7)                | 10         | 10.1                           | 2 (2.0)                        | 1 (1.0)              |
| GOL |            |                                |                                |                         | 33         | 53.9                           | 14 (2.6)                       | 6 (1.1)                 | 17         | 7.3                            | 8 (11.0)                       | 1 (1.4)              |
| VED | 7          | 3.2                            | 2 (6.3)                        | 2 (6.3)                 | 96         | 152.3                          | 28 (1.8)                       | 15 (1.0)                | 112        | 180.5                          | 30 (1.7)                       | 22 (1.2)             |
| UST |            |                                |                                |                         | 59         | 46.5                           | 7 (1.5)                        | 8 (1.7)                 | 59         | 43.8                           | 4 (0.9)                        | 16 (3.7)             |

ADA= adalimumab; ADR= adverse drug reaction; GOL= golimumab; IFX= infliximab; VED= vedolizumab; UST= ustekinumab; yrs= years.

**Figure S1.** Kaplan-Meier curve for the persistence of biologics as first-line therapy (a) and second- and third-line therapies (b).

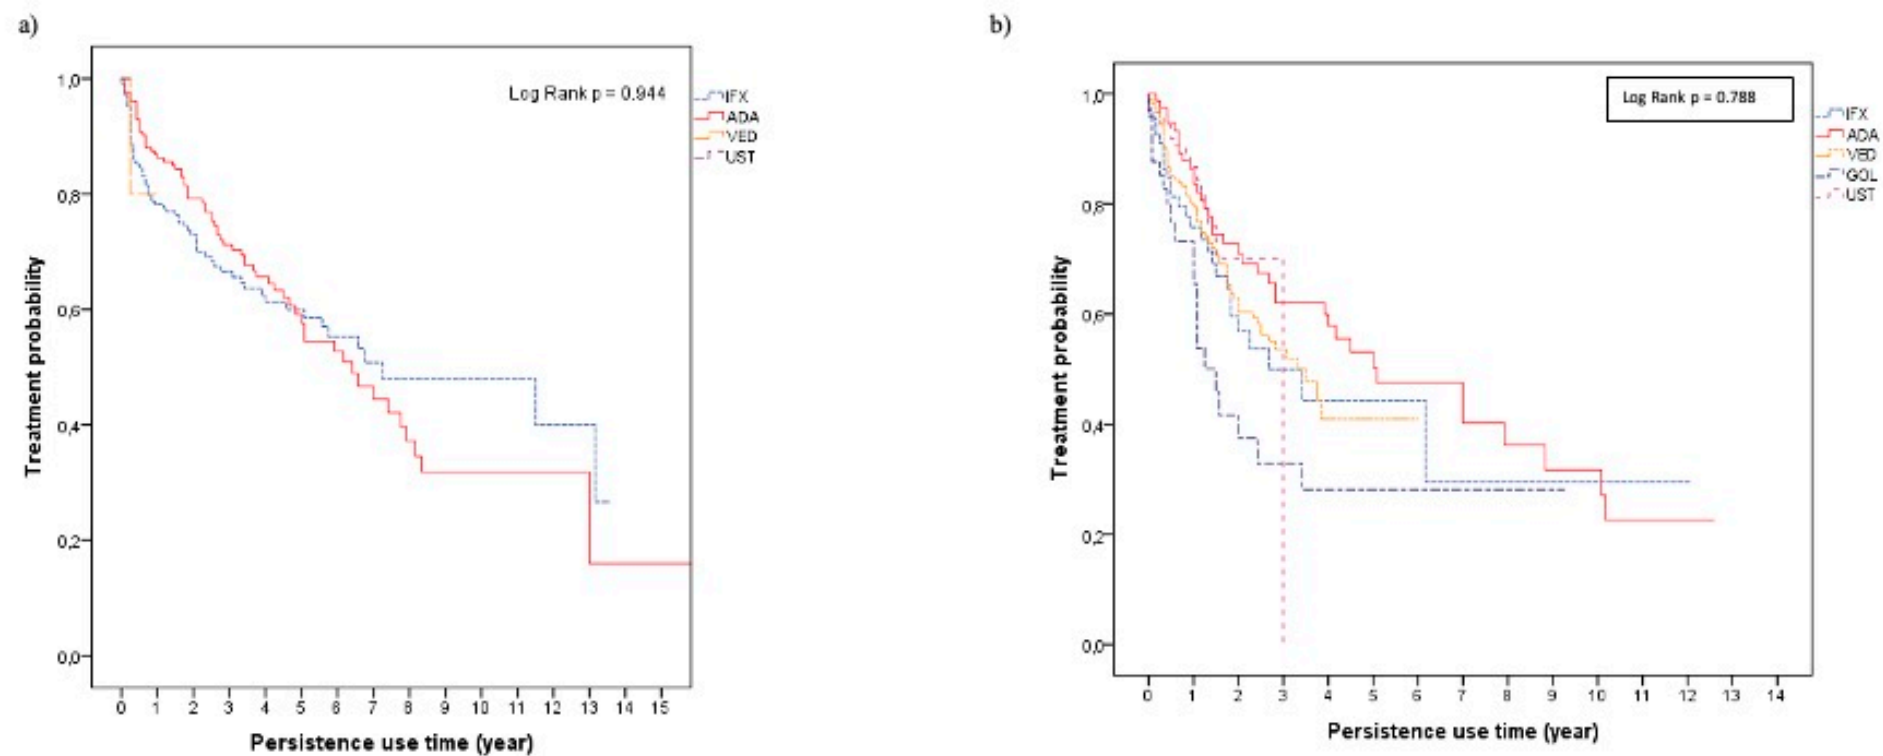

|         | Persistence Rate (%) |        |        |        |        | Median persistence time (95% CI) |
|---------|----------------------|--------|--------|--------|--------|----------------------------------|
|         | Year 1               | Year 2 | Year 3 | Year 4 | Year 5 |                                  |
| IFX     | 77.6                 | 69.9   | 65.6   | 61.3   | 58.6   | -                                |
| ADA     | 86.3                 | 78.5   | 70.3   | 64.5   | 57.6   | -                                |
| VED     | -                    | -      | -      | -      | -      | -                                |
| UST     | -                    | -      | -      | -      | -      | -                                |
| Overall | 82.2                 | 74.6   | 67.9   | 63.3   | 58.8   | 6.58 (5.33-7.83)                 |

|         | Persistence Rate (%) |        |        |        |        | Median persistence time (95% CI) |
|---------|----------------------|--------|--------|--------|--------|----------------------------------|
|         | Year 1               | Year 2 | Year 3 | Year 4 | Year 5 |                                  |
| IFX     | 73.5                 | 56.9   | 44.4   | 35.7   | 29.6   | 2.67 (0.94-4.40)                 |
| ADA     | 83.5                 | 71.0   | 62.0   | 57.9   | 50.3   | 5.08 (2.53-7.63)                 |
| VED     | 79.4                 | 60.3   | 51.9   | 41.0   | -      | 3.50 (2.49-4.52)                 |
| GOL     | 65.4                 | 37.5   | 28.1   | -      | -      | 1.50 (1.01-1.95)                 |
| UST     | 84.3                 | -      | -      | -      | -      | -                                |
| Overall | 79.8                 | 61.0   | 53.2   | 46.0   | 42.1   | 3.50 (2.61-4.39)                 |

Kaplan-Meier curve for persistence of biologics among patients in a) first-line and b) second- and third-line therapy. If event rate is lower than 50%, the median survival or its 95% CI cannot be calculated.

**Figure S2.** Kaplan-Meier curve for the persistence of biologics in patients with CD (a) and UC (b)

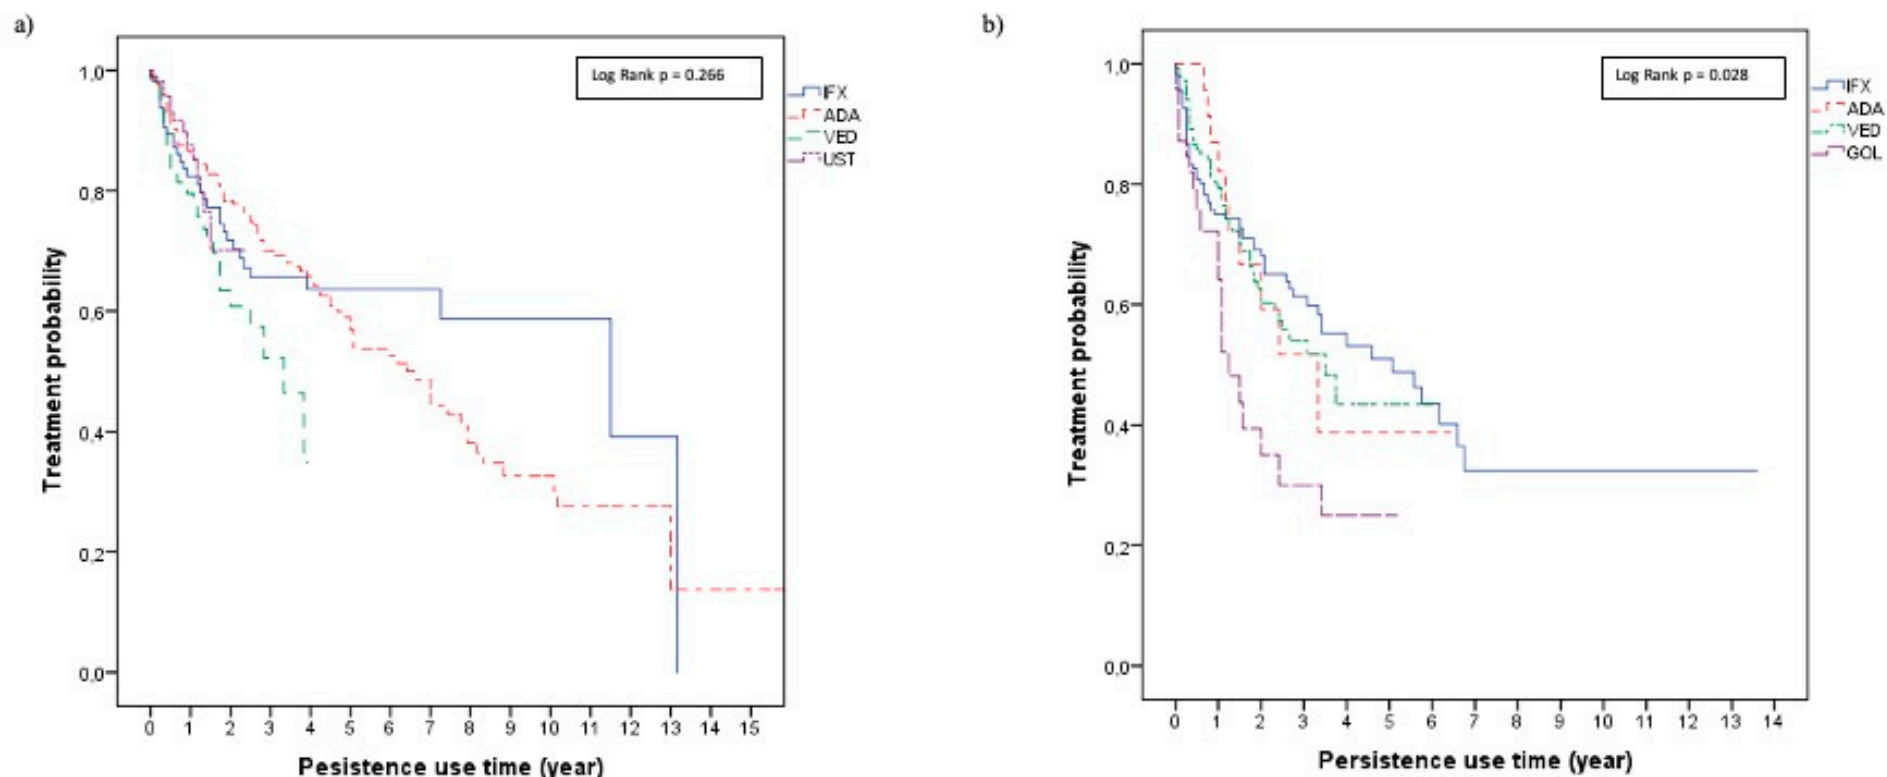

|         | Persistence Rate (%) |        |        |        |        | Median persistence time (95% CI) |
|---------|----------------------|--------|--------|--------|--------|----------------------------------|
|         | Year 1               | Year 2 | Year 3 | Year 4 | Year 5 |                                  |
| IFX     | 81.1                 | 70.3   | 65.4   | 63.6   | 62.6   | -                                |
| ADA     | 85.2                 | 77.8   | 69.3   | 65.1   | 56.8   | -                                |
| VED     | 77.6                 | 60.8   | 46.4   | 34.8   | -      | -                                |
| UST     | 85.1                 | -      | -      | -      | -      | -                                |
| Overall | 84.7                 | 73.9   | 65.9   | 61.6   | 56.0   | 7.00 (5.36-8.64)                 |

|         | Persistence Rate (%) |        |        |        |        | Median persistence time (95% CI) |
|---------|----------------------|--------|--------|--------|--------|----------------------------------|
|         | Year 1               | Year 2 | Year 3 | Year 4 | Year 5 |                                  |
| IFX     | 74.3                 | 68.2   | 59.9   | 53.1   | 48.8   | 5.08 (2.92-7.24)                 |
| ADA     | 82.1                 | 59.2   | 38.8   | -      | -      | 3.33 (1.47-5.19)                 |
| VED     | 79.3                 | 60.2   | 51.7   | -      | -      | 3.50 (2.27-4.73)                 |
| GOL     | 64.1                 | 35.0   | 25.0   | -      | -      | 2.86 (0.80-1.70)                 |
| Overall | 76.0                 | 61.8   | 54.6   | 46.1   | 43.1   | 3.42 (2.25-4.59)                 |

Kaplan-Meier curve for persistence of biologics among patients with a) CD and b) UC. If event rate is lower than 50%, the median survival or its 95% CI cannot be calculated.

**Table S2.** Type of adverse drug reactions observed during the follow-up period by therapy lines.

| Type of ADR, <i>n</i><br>(incidence per 10<br>yrs of treatment) | IFX<br>First line | IFX<br>Second<br>line | IFX<br>Third line | ADA<br>First<br>line | ADA<br>Second<br>line | ADA<br>Third<br>line | GOL<br>Second<br>line | GOL<br>Third<br>line | VED<br>First<br>line | VED<br>Second<br>line | VED<br>Third<br>line | UST<br>Second<br>line | UST<br>Third<br>line |
|-----------------------------------------------------------------|-------------------|-----------------------|-------------------|----------------------|-----------------------|----------------------|-----------------------|----------------------|----------------------|-----------------------|----------------------|-----------------------|----------------------|
| SADRs*                                                          | 12 (0.2)          | 4 (0.4)               | 1 (1.0)           | 13<br>(0.2)          | 9 (0.3)               |                      | 3 (0.6)               | 1 (1.4)              |                      | 4 (0.3)               | 12 (0.7)             | 4 (0.9)               | 2 (0.5)              |
| Infections                                                      | 18 (0.3)          | 3 (0.3)               | 1 (1.0)           | 17<br>(0.3)          | 8 (0.3)               | 1 (1.0)              | 2 (0.4)               | 2 (2.7)              | 1 (3.1)              | 7 (0.5)               | 5 (0.3)              | 1 (0.2)               | 9 (2.1)              |
| Pneumonia                                                       |                   |                       |                   | 2<br>(0.03)          | 2 (0.1)               |                      |                       |                      |                      | 1 (0.1)               | 1 (0.1)              | 1 (0.2)               |                      |
| Infusion/injection<br>related reaction                          | 23 (0.4)          | 13 (1.2)              |                   | 3<br>(0.05)          |                       |                      |                       |                      |                      | 1 (0.1)               |                      | 1 (0.2)               | 1 (0.2)              |
| Skin reaction                                                   | 10 (0.2)          |                       |                   | 20<br>(0.3)          | 4 (0.2)               |                      | 1 (0.2)               |                      |                      |                       |                      | 1 (0.2)               | 2 (0.5)              |
| Joint disease                                                   | 6 (0.1)           | 1 (0.1)               |                   | 2<br>(0.03)          | 1 (0.04)              |                      |                       |                      |                      |                       | 2 (0.1)              |                       |                      |
| Perianal disease                                                | 2 (0.03)          | 1 (0.1)               | 1 (1.0)           | 2<br>(0.03)          | 1 (0.04)              |                      |                       |                      |                      |                       | 3 (0.2)              |                       | 1 (0.2)              |
| Malignancies                                                    | 1 (0.02)          |                       | 1 (1.0)           | 2<br>(0.03)          | 1 (0.04)              |                      | 1 (0.2)               |                      |                      | 2 (0.1)               | 6 (0.3)              |                       |                      |
| Blood disorders                                                 | 2 (0.03)          |                       |                   | 2<br>(0.03)          | 1 (0.04)              |                      |                       |                      |                      | 1 (0.1)               |                      |                       |                      |
| Others                                                          | 10 (0.2)          | 1 (0.1)               |                   | 14<br>(0.2)          | 1 (0.04)              |                      | 1 (0.2)               |                      | 1 (3.1)              | 3 (0.2)               | 6 (0.3)              | 3 (0.6)               | 3 (0.7)              |

\*SADRs include hospitalization, life-threatening, surgery, malignancies and death

ADA= adalimumab; ADR= adverse drug reaction; GOL= golimumab; IFX= infliximab; VED= vedolizumab; UST= ustekinumab; yrs= years.
